# Supplementary material for: Cr-doped CoFe2O4 nanorod array modified by oxygen vacancy-rich cerium oxide as an efficient bifunctional total water splitting catalyst
Source: Royal Society of Chemistry journal article supplement (doi:10.1039/d4se00966e), 2024-01-01
Supplement: d4se00966e1.pdf [file d4se00966e1.pdf]

## Supplemental Information

**Fig. S1** XRD spectra of the catalyst (a)  $\text{CoFe}_2\text{O}_4$  and  $\text{CoCr}_{0.6}\text{Fe}_{1.4}\text{O}_4$ , (b)  $\text{CoCr}_y\text{Fe}_{2-y}\text{O}_4@ \text{CeO}_x$ .

**Fig. S2** XPS spectrum of  $\text{CoCr}_{0.6}\text{Fe}_{1.4}\text{O}_4@ \text{CeO}_x$ .

**Fig. S3** Co 2p spectra of different catalysts: (a)  $\text{CoFe}_2\text{O}_4$ , (b)  $\text{CoCr}_{0.6}\text{Fe}_{1.4}\text{O}_4$ .

**Fig. S4** XPS spectrum of Cr 2p in  $\text{CoCr}_{0.6}\text{Fe}_{1.4}\text{O}_4$ .

**Fig. S5** Fe 2p spectra of different catalysts: (a)  $\text{CoFe}_2\text{O}_4$ , (b)  $\text{CoCr}_{0.6}\text{Fe}_{1.4}\text{O}_4$ .

**Fig. S6** O1s spectra of different catalysts: (a)  $\text{CoFe}_2\text{O}_4$ , (b)  $\text{CoCr}_{0.6}\text{Fe}_{1.4}\text{O}_4$ .

**Fig. S7** Nitrogen adsorption-desorption isotherm and pore-size distribution of (a)  $\text{CoFe}_2\text{O}_4$  and (b)  $\text{CoCr}_{0.6}\text{Fe}_{1.4}\text{O}_4@ \text{CeO}_x$ .

**Fig.S8** Comparison of  $\text{CoCr}_{0.6}\text{Fe}_{1.4}\text{O}_4@ \text{CeO}_x/\text{NF}$  after 1000 CV scans with the initial OER LSV curve.

**Fig.S9** Comparison of  $\text{CoCr}_{0.6}\text{Fe}_{1.4}\text{O}_4@ \text{CeO}_x/\text{NF}$  after 1000 CV scans with the initial HER LSV curve.

**Fig. S10** Equivalent circuit at the electrode/electrolyte interface.

**Fig. S11** CV curves measurements of different samples at various scan rates: (a)  $\text{CoCr}_{0.6}\text{Fe}_{1.4}\text{O}_4@ \text{CeO}_x$ , (b)  $\text{CoCr}_{0.6}\text{Fe}_{1.4}\text{O}_4$ , (c)  $\text{CoFe}_2\text{O}_4$ , and (d)  $\text{CoCr}_{0.8}\text{Fe}_{1.2}\text{O}_4@ \text{CeO}_x$ .

**Fig. S12** Relationship between capacitive current density and scan rate for different  $\text{CoCr}_y\text{Fe}_{2-y}\text{O}_4@ \text{CeO}_x$  electrodes.

**Fig. S13** SEM plot of  $\text{CoCr}_{0.6}\text{Fe}_{1.4}\text{O}_4@ \text{CeO}_x/\text{NF}$  nanorods after OER reaction.

**Table S1** Potentials (U) at 100 mA and conductivity ( $\rho$ ) of different catalysts obtained by four-point probe device.

**Supplementary Note 1.**

**Supplementary Note 2.**

**Supplementary Note 3.**

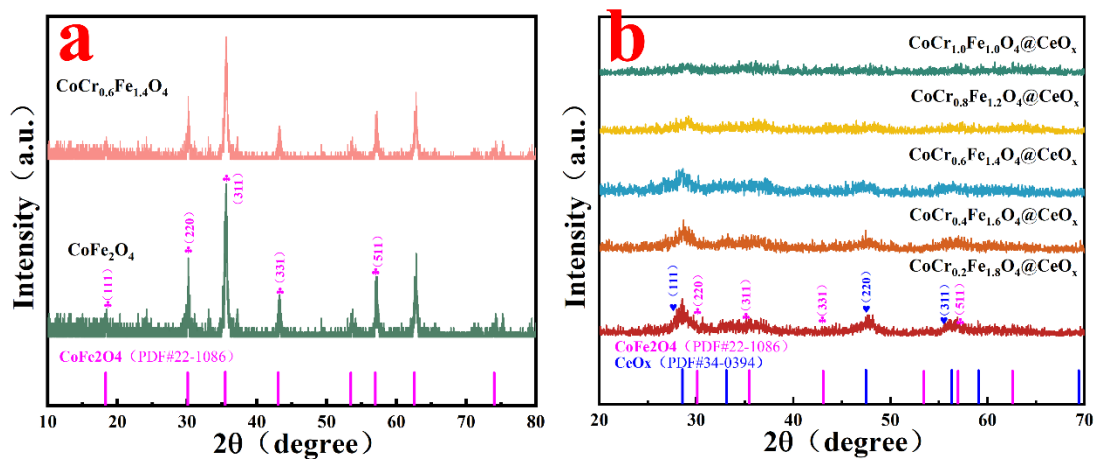

Fig. S1 XRD spectra of the catalyst (a)  $\text{CoFe}_2\text{O}_4$  and  $\text{CoCr}_{0.6}\text{Fe}_{1.4}\text{O}_4$ , (b)  $\text{CoCr}_y\text{Fe}_{2-y}\text{O}_4@ \text{CeO}_x$ .

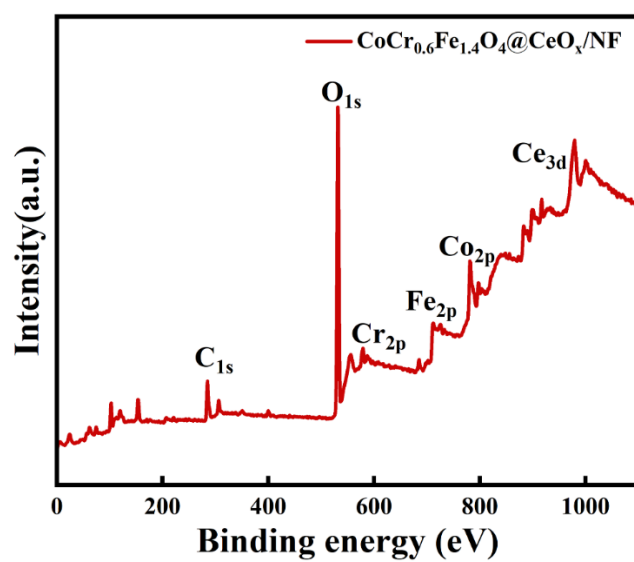

Fig. S2 XPS spectrum of  $\text{CoCr}_{0.6}\text{Fe}_{1.4}\text{O}_4@ \text{CeO}_x$ .

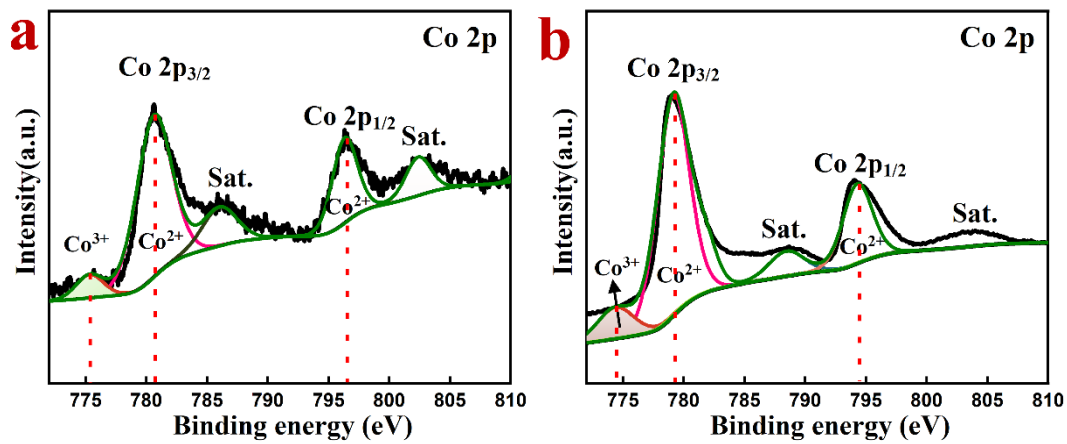

Fig. S3 Co 2p XPS spectra of different catalysts: (a) CoFe<sub>2</sub>O<sub>4</sub>, (b) CoCr<sub>0.6</sub>Fe<sub>1.4</sub>O<sub>4</sub>.

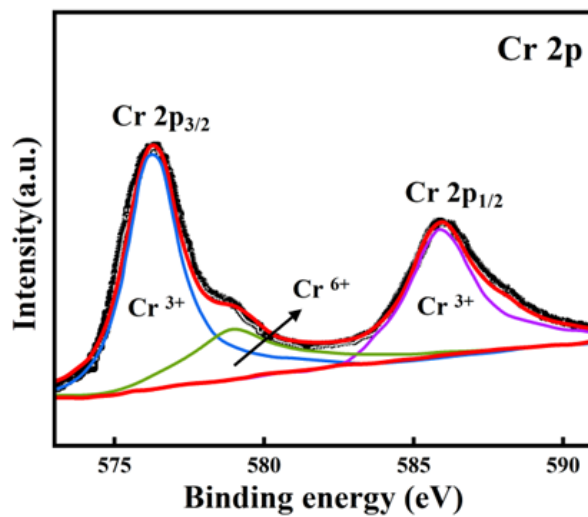

Fig. S4 XPS spectrum of Cr 2p in CoCr<sub>0.6</sub>Fe<sub>1.4</sub>O<sub>4</sub>.

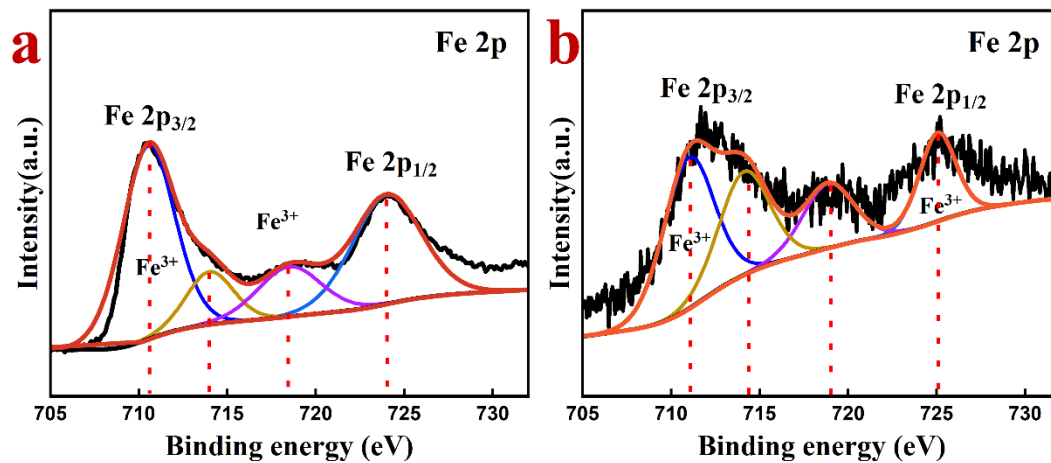

Fig. S5 Fe 2p XPS spectra of different catalysts: (a) CoFe<sub>2</sub>O<sub>4</sub>, (b) CoCr<sub>0.6</sub>Fe<sub>1.4</sub>O<sub>4</sub>.

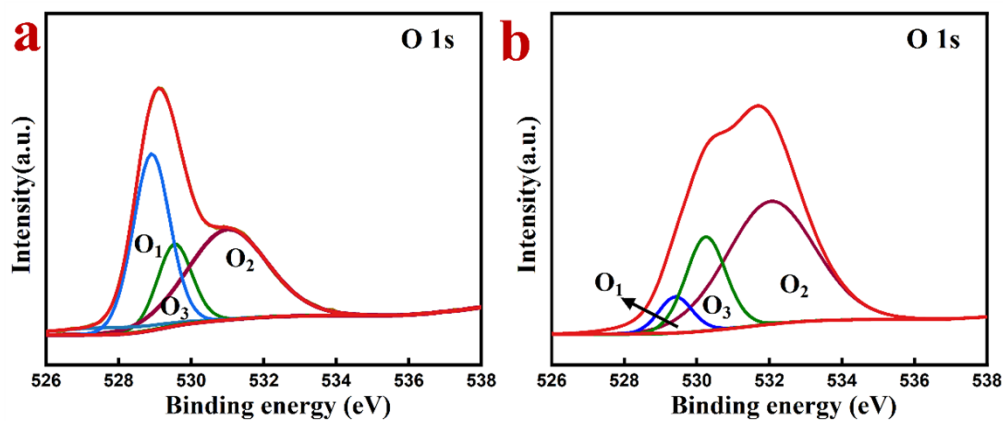

Fig. S6 O1s spectra of different catalysts: (a)  $\text{CoFe}_2\text{O}_4$ , (b)  $\text{CoCr}_{0.6}\text{Fe}_{1.4}\text{O}_4$ .

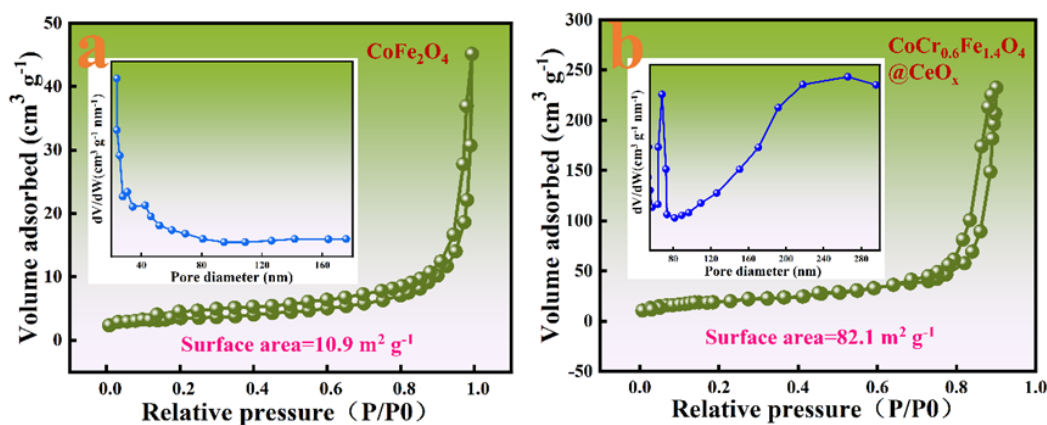

Fig. S7 Nitrogen adsorption-desorption isotherm and pore-size distribution of (a)  $\text{CoFe}_2\text{O}_4$  and (b)  $\text{CoCr}_{0.6}\text{Fe}_{1.4}\text{O}_4 @ \text{CeO}_x$ .

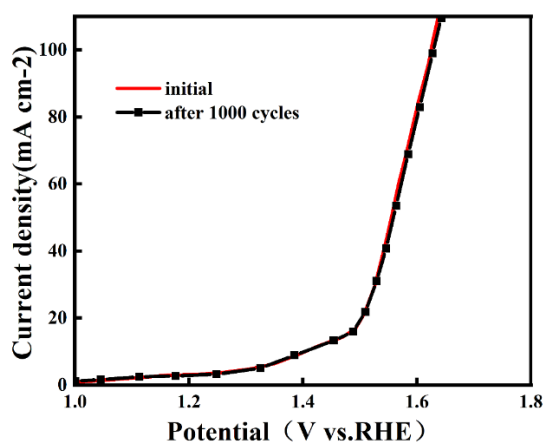

Fig. S8 Comparison of  $\text{CoCr}_{0.6}\text{Fe}_{1.4}\text{O}_4 @ \text{CeO}_x / \text{NF}$  after 1000 CV scans with the initial OER LSV curve.

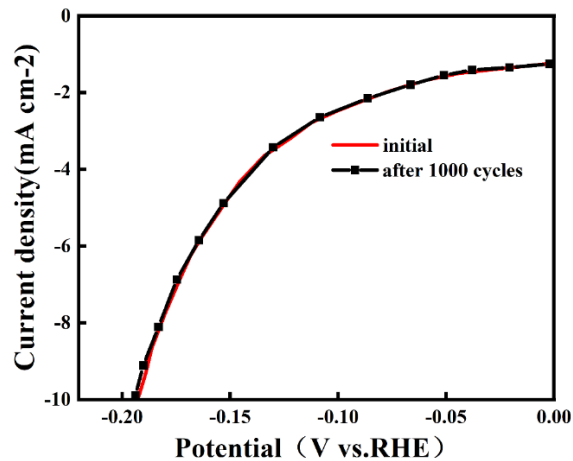

**Fig. S9** Comparison of  $\text{CoCr}_{0.6}\text{Fe}_{1.4}\text{O}_4@\text{CeO}_x/\text{NF}$  after 1000 CV scans with the initial HER LSV curve.

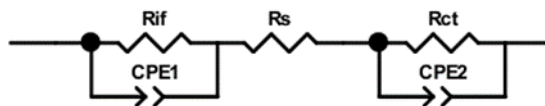

**Fig. S10** Equivalent circuit at the electrode/electrolyte interface.

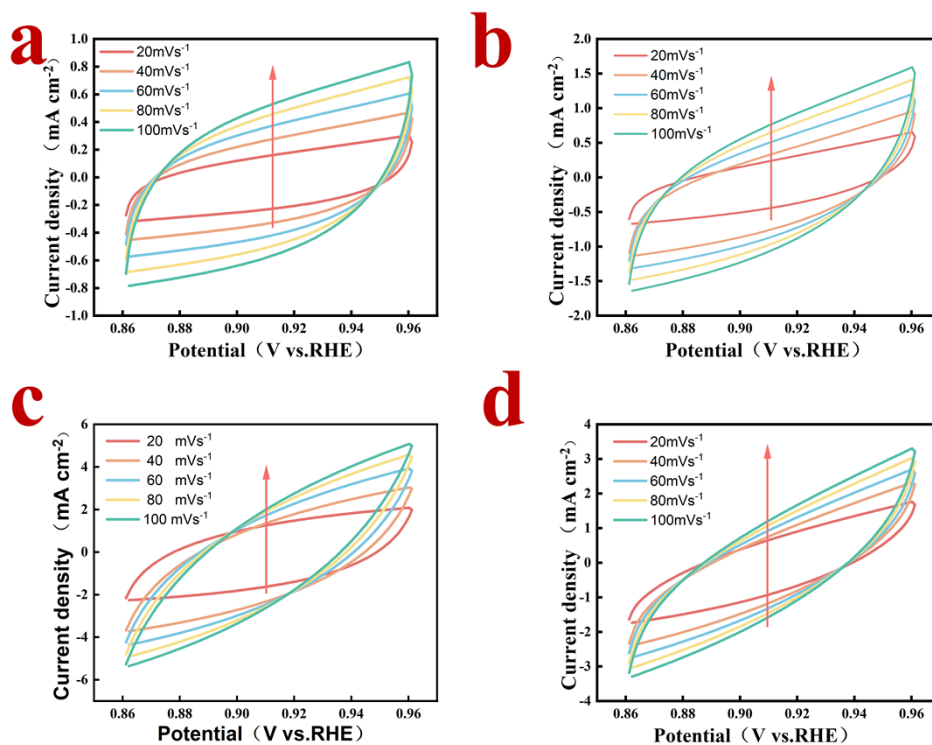

**Fig. S11** CV curves measurements of different samples at various scan rates: (a)  $\text{CoCr}_{0.6}\text{Fe}_{1.4}\text{O}_4@\text{CeO}_x$ , (b)  $\text{CoCr}_{0.6}\text{Fe}_{1.4}\text{O}_4$ , (c)  $\text{CoFe}_2\text{O}_4$ , and (d)  $\text{CoCr}_{0.8}\text{Fe}_{1.2}\text{O}_4@\text{CeO}_x$ .

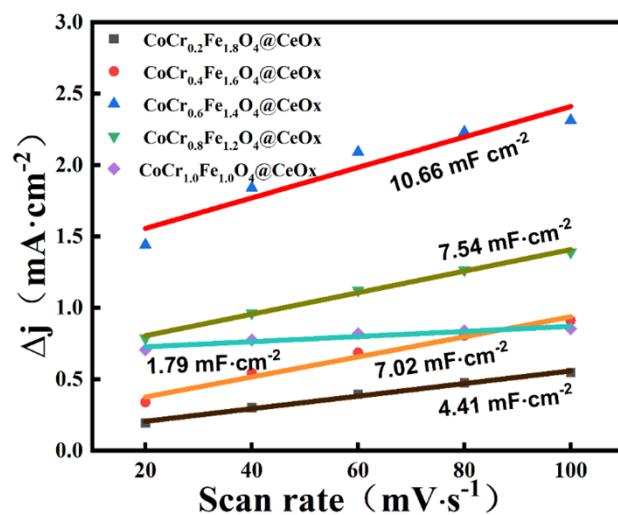

**Fig. S12** Relationship between capacitive current density and scan rate for different  $\text{CoCr}_y\text{Fe}_{2-y}\text{O}_4@\text{CeO}_x$  electrodes.

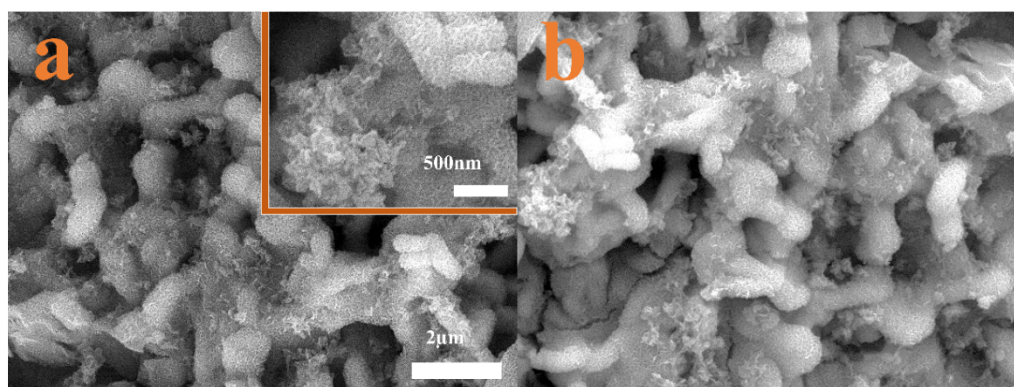

**Fig. S13** SEM plot of  $\text{CoCr}_{0.6}\text{Fe}_{1.4}\text{O}_4@\text{CeO}_x/\text{NF}$  nanorods after OER reaction.

**Table S1** Potentials (U) at 100 mA and conductivity ( $\rho$ ) of different catalysts obtained by four-point probe device.

| Materials                                            | U1<br>(mV) | U2<br>(mV) | U3<br>(mV) | U4<br>(mV) | U5<br>(mV) | Average<br>value of U<br>(mV) | $\rho$ ( $\Omega\cdot\text{m}$ ) |
|------------------------------------------------------|------------|------------|------------|------------|------------|-------------------------------|----------------------------------|
| CoFe <sub>2</sub> O <sub>4</sub>                     | 25.17      | 30.43      | 27.43      | 26.81      | 26.87      | 27.34                         | 2.10 x10 <sup>-3</sup>           |
| CoCr <sub>0.6</sub> Fe <sub>1.4</sub> O <sub>4</sub> | 12.14      | 14.11      | 11.34      | 11.45      | 12.89      | 12.39                         | 9.53 x10 <sup>-4</sup>           |

### Supplementary Note 1

XRD sample preparation, the nickel foam loaded with the target sample is cut to 10 mm × 10 mm size for testing.

HR-TEM sample preparation, nickel foam is magnetic and the magnetism of the sample will affect the HR-TEM results, so to reduce the effect of nickel foam on HR-TEM results, we used physical stripping to collect a sufficient amount of powder samples and grind the powder samples to reduce the size. Then the appropriate amount of powder and ethanol were taken and added to a small beaker for ultrasonic oscillation for 30 min. After the end of ultrasonication, a homogeneous mixture of powder and ethanol was sucked up with a glass capillary tube, and then 2~3 drops of this mixture were dropped onto a microgrid (diameter 3 mm), and when the ethanol on the microgrid evaporated, it was ready to be tested.

XPS sample preparation and sample magnetism will affect the test results, so still selected powder samples for testing, using the physical stripping method to collect a sufficient amount of powder samples, and grinding of powder samples to reduce the size. The powder sample is then pressed with a tablet press, cut down to 5 mm × 5 mm size, and stuck to the XPS sample stage using conductive adhesive for testing.

### Supplementary Note 2

Conductivity of samples before and after Cr doping by four-point probe method. To further reveal the conductivity before and after Cr doping, we measure the resistivity of CoFe<sub>2</sub>O<sub>4</sub> and CoCr<sub>0.6</sub>Fe<sub>1.4</sub>O<sub>4</sub> by using the four-point probe method. First, the CoFe<sub>2</sub>O<sub>4</sub> and CoCr<sub>0.6</sub>Fe<sub>1.4</sub>O<sub>4</sub> powders were respectively pressed into 2 × 2

---

cm<sup>2</sup> tablets, and their thickness is 0.2 cm. Then, these samples were measured their related potential at a certain current by using a four-point probe device (Shanghai Qianfeng Co., SQ120/2), and the resistivity values can be calculated by the following equation [1-4]:

$$\rho = C \cdot \frac{U}{I} \cdot W$$

Where the  $\rho$  is the resistivity, the  $U$ ,  $I$  and  $W$  are the potential, current, and thickness of sample, the  $C$  is the corrective factor that is related to the shape and width of sample. In this work, the  $W$  is 0.2 cm, the  $I$  is 100 mA, and the  $C$  is 3.846 [3-5].

### Supplementary Note 3

Hydrogen and oxygen evolution measurements:

The amount of H<sub>2</sub> produced on the CoCr<sub>0.6</sub>Fe<sub>1.4</sub>O<sub>4</sub>@CeO<sub>x</sub>/NF electrode at a constant current density of 20 mA·cm<sup>-2</sup> in 1.0 M KOH was measured by using gas chromatography (GC, Tianmei Scheme 1 The procedure for the preparation of the CoCr<sub>0.6</sub>Fe<sub>1.4</sub>O<sub>4</sub>@CeO<sub>x</sub>/NF hybrid. 3301 company, GC7890II) with high purity N<sub>2</sub> (containing 2% CH<sub>4</sub>) as carrier gas. The CoCr<sub>0.6</sub>Fe<sub>1.4</sub>O<sub>4</sub>@CeO<sub>x</sub>/NF electrode had a geometric area of of 1.0 cm × 0.5 cm. The electrolysis measurements were carried out in a special three-compartment electrochemical cell. The three compartments were connected at the bottom and the compartment for the working electrode had an air-inlet tube reaching to the bottom and a top opening that could be sealed from air with a rubber stopper. Before measurements, the electrolyte was bubbled with N<sub>2</sub> for 30 min to remove dissolved oxygen in solution and air in the compartments. The gas sample was taken from the working electrode chamber with a gas tight syringe through the sealed rubber cap at electrolysis time of 5, 10, 15, 20, 25, and 30 min. The evolution of H<sub>2</sub> was calculated out by integrating the peak area in GC spectra. The relationship between the peak area of H<sub>2</sub> in GC spectra and the actual H<sub>2</sub> amount was firstly calibrated using Pt electrode. The theoretically expected evolution of H<sub>2</sub> at constant  $j$  of 20 mA·cm<sup>-2</sup> was calculated according to Faraday's law, and the Faradic efficiency for HER at working electrode was estimated by comparing the measured



---

and calculated values.

The amount of O<sub>2</sub> produced on the CoCr<sub>0.6</sub>Fe<sub>1.4</sub>O<sub>4</sub>@CeO<sub>x</sub>/NF electrode at a constant current density of 20 mA·cm<sup>-2</sup> in 1.0 M KOH was measured by using O<sub>2</sub> fluorescence detector (Ocean Optics, R-sensor) in the working electrode compartment. Before measurements, the working electrode compartment was purged with N<sub>2</sub> for 30 min. During the oxygen evolution at a constant *j* of 20 mA·cm<sup>-2</sup> for 30 min, the amount of O<sub>2</sub> on the CoCr<sub>0.6</sub>Fe<sub>1.4</sub>O<sub>4</sub>@CeO<sub>x</sub>/NF was directly measured by the O<sub>2</sub> sensor. The theoretically expected evolution of O<sub>2</sub> at constant *j* of 20 mA·cm<sup>-2</sup> was calculated according to Faraday's law, and the Faradic efficiency for OER at working electrode was estimated by comparing the measured and calculated values.

## References

- [1] Chen. Y, Juang. J, Finite element analysis and equivalent parallel-resistance model for conductive multilayer thin films, *Meas. Sci. Technol.* 27 (2016) 074006
- [2] Xue. J, Al-Dahhan. M, Dudukovic. M, Mudde. R, Four-point optical probe for measurement of bubble dynamics: Validation of the technique, *Flow. Meas. Instrum.* 19 (2008) 293-300.
- [3] Tehrani. S, Lim. W, Lee. L, Correction factors for films resistivity measurement, *Measurement.* 45 (2012) 219-225.
- [4] Dutta. B, Fahmy. N, Pegg. I, Effect of mixing transition ions in glasses. II. The P<sub>2</sub>O<sub>5</sub>-Fe<sub>2</sub>O<sub>3</sub>-MnO system, *J. Non-cryst. Solids.* 351 (2005) 2552-2561.
- [5] Kleinlogel. C, Gauckler. L, Mixed electronic-ionic conductivity of cobalt doped cerium gadolinium oxide, *J. Electroceram.* 5 (2000) 231-243.
